# Supplementary material
Source: publisher site journal article supplement (https://www.dovepress.com/article/311291)
Supplement: Supplementary file 1 [file get_supplementary_file.php]

**Supplementary Table 1. LogFC of candidate DEGs in choriocarcinoma.**

| <b>ID</b>               | <b>logFC</b> | <b>Gene.symbol</b> | <b>ID</b>                 | <b>logFC</b> | <b>Gene.symbol</b> |
|-------------------------|--------------|--------------------|---------------------------|--------------|--------------------|
| <b>Upregulated DEGs</b> |              |                    | <b>Downregulated DEGs</b> |              |                    |
| 201131_s_at             | 6.9625187    | CDH1               | 201110_s_at               | -2.3859976   | THBS1              |
| 209242_at               | 6.559966     | PEG3               | 202484_s_at               | -2.3902142   | MBD2               |
| 221690_s_at             | 6.4585211    | NLRP2              | 212993_at                 | -2.3931943   | NACC2              |
| 204637_at               | 6.0593847    | CGA                | 203102_s_at               | -2.3948523   | MGAT2              |
| 219529_at               | 5.9037535    | CLIC3              | 212530_at                 | -2.4076347   | NEK7               |
| 201650_at               | 5.6965555    | KRT19              | 212771_at                 | -2.4116616   | FAM171A1           |
| 219823_at               | 5.6128078    | LIN28A             | 203243_s_at               | -2.4120027   | PDLIM5             |
| 209757_s_at             | 5.0380612    | MYCN               | 209909_s_at               | -2.4124992   | TGFB2              |
| 214612_x_at             | 5.0379065    | MAGEA6             | 206382_s_at               | -2.4207037   | BDNF               |
| 201839_s_at             | 4.9950881    | EPCAM              | 205596_s_at               | -2.422273    | SMURF2             |
| 204724_s_at             | 4.9442599    | COL9A3             | 212295_s_at               | -2.4266278   | SLC7A1             |
| 205081_at               | 4.9310658    | CRIP1              | 216442_x_at               | -2.4364651   | FN1                |
| 204351_at               | 4.9251753    | S100P              | 203987_at                 | -2.4427915   | FZD6               |
| 209942_x_at             | 4.8877608    | MAGEA6///MAGEA3    | 209040_s_at               | -2.4459169   | PSMB8              |
| 202525_at               | 4.8813919    | PRSS8              | 202946_s_at               | -2.4547014   | BTBD3              |
| 204437_s_at             | 4.8796714    | FOLR1              | 45297_at                  | -2.4584934   | EHD2               |
| 204836_at               | 4.7940932    | GLDC               | 201474_s_at               | -2.4719752   | ITGA3              |
| 202499_s_at             | 4.7138591    | SLC2A3             | 202794_at                 | -2.482235    | INPP1              |
| 218035_s_at             | 4.6423814    | RBM47              | 207714_s_at               | -2.4822967   | SERPINH1           |
| 210074_at               | 4.4322237    | CTSV               | 200794_x_at               | -2.4908886   | DAZAP2             |
| 210467_x_at             | 4.3976936    | MAGEA12            | 212614_at                 | -2.4921641   | ARID5B             |
| 202546_at               | 4.3849334    | VAMP8              | 218651_s_at               | -2.5126333   | LARP6              |
| 205555_s_at             | 4.3691432    | MSX2               | 219148_at                 | -2.5184369   | PBK                |
| 209735_at               | 4.284078     | ABCG2              | 215313_x_at               | -2.5216421   | HLA-A              |
| 202409_at               | 4.2454308    | INS-IGF2///IGF2    | 204115_at                 | -2.5302393   | GNG11              |
| 212964_at               | 4.2286195    | HIC2               | 204141_at                 | -2.531647    | TUBB2A             |
| 213523_at               | 4.2246408    | CCNE1              | 205573_s_at               | -2.5341625   | SNX7               |
| 208146_s_at             | 4.2127124    | CPVL               | 210139_s_at               | -2.5371745   | PMP22              |
| 204588_s_at             | 4.2068905    | SLC7A7             | 218718_at                 | -2.54679     | PDGFC              |

|             |           |                                      |             |            |                     |
|-------------|-----------|--------------------------------------|-------------|------------|---------------------|
| 200606_at   | 4.1466021 | DSP                                  | 204285_s_at | -2.5472628 | PMAIP1              |
| 218186_at   | 3.9942991 | RAB25                                | 214500_at   | -2.5525395 | H2AFY               |
| 221245_s_at | 3.9729582 | FZD5                                 | 216438_s_at | -2.5553122 | TMSB4X              |
| 215729_s_at | 3.9466441 | VGLL1                                | 204135_at   | -2.584004  | FILIP1L             |
| 209604_s_at | 3.9117233 | GATA3                                | 212203_x_at | -2.5871735 | IFITM3              |
| 220139_at   | 3.8888106 | DNMT3L                               | 214104_at   | -2.594476  | GPR161              |
| 219228_at   | 3.8482337 | ZNF331                               | 202519_at   | -2.601936  | MLXIP               |
| 219814_at   | 3.8265668 | MBNL3                                | 212453_at   | -2.6030536 | KIF1BP              |
| 222088_s_at | 3.8082437 | SLC2A14///SLC2A3                     | 201578_at   | -2.6043031 | PODXL               |
| 201909_at   | 3.7770245 | RPS4Y1                               | 221211_s_at | -2.6093691 | MAP3K7CL            |
| 209324_s_at | 3.7613025 | RGS16                                | 221728_x_at | -2.6230205 | XIST                |
| 205286_at   | 3.7567236 | TFAP2C                               | 218782_s_at | -2.6354862 | ATAD2               |
| 204039_at   | 3.7331461 | CEBPA                                | 221748_s_at | -2.6384718 | TNS1                |
| 206269_at   | 3.6776311 | GCM1                                 | 220014_at   | -2.6446729 | PRR16               |
| 202345_s_at | 3.6642185 | FABP5                                | 208818_s_at | -2.6737521 | COMT                |
| 209652_s_at | 3.6626521 | PGF                                  | 201825_s_at | -2.6837305 | SCCPDH              |
| 210715_s_at | 3.6318393 | SPINT2                               | 209210_s_at | -2.6851955 | FERMT2              |
| 205030_at   | 3.6225526 | FABP7                                | 212887_at   | -2.7080788 | SEC23A              |
| 37117_at    | 3.6056698 | PRR5-ARHGAP8///ARH<br>GAP8           | 211671_s_at | -2.7101071 | NR3C1               |
| 205387_s_at | 3.5891815 | CGB1///CGB8///CGB7///<br>CGB5///CGB3 | 212314_at   | -2.7383566 | SEL1L3              |
| 202965_s_at | 3.5857235 | CAPN6                                | 203510_at   | -2.7492264 | MET                 |
| 211737_x_at | 3.5531314 | PTN                                  | 205904_at   | -2.7607491 | MICA                |
| 209301_at   | 3.5147479 | CA2                                  | 204159_at   | -2.7638653 | CDKN2C              |
| 214603_at   | 3.4820017 | MAGEA2B///MAGEA2                     | 202760_s_at | -2.7666903 | PALM2-AKAP2///AKAP2 |
| 212737_at   | 3.4715262 | GM2A                                 | 212739_s_at | -2.7892787 | NME4                |
| 219010_at   | 3.469412  | C1orf106                             | 221011_s_at | -2.7898937 | LBH                 |
| 208885_at   | 3.4633421 | LCP1                                 | 209946_at   | -2.7931387 | VEGFC               |
| 209031_at   | 3.454259  | CADM1                                | 209524_at   | -2.7983664 | HDGFRP3             |
| 204364_s_at | 3.4507996 | REEP1                                | 213428_s_at | -2.8009271 | COL6A1              |
| 220668_s_at | 3.4164807 | DNMT3B                               | 217826_s_at | -2.8023462 | UBE2J1              |
| 218764_at   | 3.4114633 | PRKCH                                | 218005_at   | -2.8079056 | ZNF22               |
| 203126_at   | 3.3975533 | IMPA2                                | 204521_at   | -2.8087672 | FAM216A             |

|             |           |          |             |            |                                                                                                                                                                            |
|-------------|-----------|----------|-------------|------------|----------------------------------------------------------------------------------------------------------------------------------------------------------------------------|
| 215440_s_at | 3.3707005 | BEX4     | 203939_at   | -2.8149911 | NT5E                                                                                                                                                                       |
| 212057_at   | 3.3477748 | GSE1     | 211564_s_at | -2.8262103 | PDLIM4                                                                                                                                                                     |
| 212070_at   | 3.3112588 | ADGRG1   | 201152_s_at | -2.8270052 | MBNL1                                                                                                                                                                      |
| 203638_s_at | 3.2860893 | FGFR2    | 202628_s_at | -2.8338719 | SERPINE1                                                                                                                                                                   |
| 219121_s_at | 3.2846767 | ESRP1    | 212012_at   | -2.8381513 | PXDN                                                                                                                                                                       |
| 219932_at   | 3.2727223 | SLC27A6  | 213093_at   | -2.841262  | PRKCA                                                                                                                                                                      |
| 208096_s_at | 3.1970703 | COL21A1  | 212185_x_at | -2.8537095 | MT2A                                                                                                                                                                       |
| 218454_at   | 3.1786126 | PLBD1    | 218888_s_at | -2.8571782 | NETO2                                                                                                                                                                      |
| 217744_s_at | 3.1622768 | PERP     | 211458_s_at | -2.8581717 | GABARAPL3///GABARAPL1                                                                                                                                                      |
| 202826_at   | 3.1569022 | SPINT1   | 203789_s_at | -2.8717846 | SEMA3C                                                                                                                                                                     |
| 220225_at   | 3.1075835 | IRX4     | 202983_at   | -2.8734781 | HLTF                                                                                                                                                                       |
| 220136_s_at | 3.1036574 | CRYBA2   | 203148_s_at | -2.8756434 | TRIM14                                                                                                                                                                     |
| 218404_at   | 3.0842759 | SNX10    | 212154_at   | -2.8913341 | SDC2                                                                                                                                                                       |
| 202790_at   | 2.9999624 | CLDN7    | 203417_at   | -2.9103402 | MFAP2                                                                                                                                                                      |
| 210367_s_at | 2.9823138 | PTGES    | 202845_s_at | -2.9170707 | RALBP1                                                                                                                                                                     |
| 209723_at   | 2.981811  | SERPINB9 | 204421_s_at | -2.9199539 | FGF2                                                                                                                                                                       |
| 204416_x_at | 2.9512144 | APOC1    | 211071_s_at | -2.9329121 | MLLT11                                                                                                                                                                     |
| 209448_at   | 2.9497027 | HTATIP2  | 201631_s_at | -2.9411407 | IER3                                                                                                                                                                       |
| 202688_at   | 2.9291537 | TNFSF10  | 200974_at   | -2.9747922 | ACTA2                                                                                                                                                                      |
| 210274_at   | 2.9188173 | MAGEA8   | 201462_at   | -2.9964636 | SCRN1                                                                                                                                                                      |
| 208510_s_at | 2.9095517 | PPARG    | 221773_at   | -3.0152618 | ELK3                                                                                                                                                                       |
| 212611_at   | 2.9070617 | DTX4     | 209356_x_at | -3.0188241 | EFEMP2                                                                                                                                                                     |
| 205865_at   | 2.8639192 | ARID3A   | 208966_x_at | -3.0216697 | IFI16                                                                                                                                                                      |
| 204731_at   | 2.8582289 | TGFBR3   | 204073_s_at | -3.0323551 | MYRF                                                                                                                                                                       |
| 205829_at   | 2.8475361 | HSD17B1  | 215016_x_at | -3.0337409 | DST                                                                                                                                                                        |
| 201428_at   | 2.8413697 | CLDN4    | 209156_s_at | -3.0338115 | COL6A2                                                                                                                                                                     |
| 202286_s_at | 2.825582  | TACSTD2  | 201315_x_at | -3.0394173 | IFITM2                                                                                                                                                                     |
| 206683_at   | 2.8217647 | ZNF165   | 213455_at   | -3.0518443 | FAM114A1                                                                                                                                                                   |
| 218967_s_at | 2.7862674 | PTER     | 205967_at   | -3.0538278 | HIST2H4B///HIST4H4///HIST<br>2H4A///HIST1H4L///HIST1H4<br>E///HIST1H4B///HIST1H4H///<br>HIST1H4C///HIST1H4J///HIS<br>T1H4K///HIST1H4F///HIST1H<br>4D///HIST1H4A///HIST1H4I |

|             |           |                         |             |            |               |
|-------------|-----------|-------------------------|-------------|------------|---------------|
| 203767_s_at | 2.7549178 | STS                     | 204992_s_at | -3.0594099 | PFN2          |
| 205710_at   | 2.7517133 | LRP2                    | 200985_s_at | -3.0759796 | CD59          |
| 209758_s_at | 2.7429191 | MFAP5                   | 201850_at   | -3.0805146 | CAPG          |
| 202800_at   | 2.7296546 | SLC1A3                  | 219778_at   | -3.1355202 | ZFPM2         |
| 204672_s_at | 2.7150961 | ANKRD6                  | 203851_at   | -3.1371783 | IGFBP6        |
| 207085_x_at | 2.697452  | CSF2RA                  | 201579_at   | -3.1475539 | FAT1          |
| 219461_at   | 2.6883962 | PAK6                    | 206825_at   | -3.1605738 | OXTR          |
| 209016_s_at | 2.6812301 | KRT7                    | 213094_at   | -3.1661372 | ADGRG6        |
| 209822_s_at | 2.6430367 | VLDLR                   | 201464_x_at | -3.1837305 | JUN           |
| 208650_s_at | 2.6308021 | CD24                    | 219654_at   | -3.1851474 | HACD1         |
| 38918_at    | 2.6167875 | SOX13                   | 215446_s_at | -3.1989765 | LOX           |
| 202454_s_at | 2.5935931 | ERBB3                   | 210302_s_at | -3.1990127 | MAB21L2       |
| 219142_at   | 2.5696987 | RASL11B                 | 218380_at   | -3.2054539 | LOC728392     |
| 204309_at   | 2.5589676 | CYP11A1                 | 219117_s_at | -3.2139169 | FKBP11        |
| 221766_s_at | 2.5219122 | FAM46A                  | 202718_at   | -3.2173525 | IGFBP2        |
| 203185_at   | 2.5092865 | RASSF2                  | 208998_at   | -3.2231454 | UCP2          |
| 213030_s_at | 2.4916299 | PLXNA2                  | 209581_at   | -3.2287246 | PLA2G16       |
| 220161_s_at | 2.4742882 | EPB41L4B                | 201841_s_at | -3.2317488 | HSPB1         |
| 213050_at   | 2.4706436 | COBL                    | 210095_s_at | -3.2444609 | IGFBP3        |
| 204087_s_at | 2.4702059 | SLC5A6                  | 201842_s_at | -3.2589811 | EFEMP1        |
| 213133_s_at | 2.4476246 | LOC101060817///GCS<br>H | 201150_s_at | -3.2654929 | TIMP3         |
| 203786_s_at | 2.4441059 | TPD52L1                 | 201041_s_at | -3.2659027 | DUSP1         |
| 218963_s_at | 2.4330877 | KRT23                   | 200762_at   | -3.2722633 | DPYSL2        |
| 212762_s_at | 2.4143047 | TCF7L2                  | 210764_s_at | -3.2849993 | CYR61         |
| 207076_s_at | 2.4085244 | ASS1                    | 201324_at   | -3.2892799 | EMP1          |
| 46665_at    | 2.345595  | SEMA4C                  | 209803_s_at | -3.2910508 | PHLDA2        |
| 202712_s_at | 2.3338626 | CKMT1A///CKMT1B         | 201522_x_at | -3.2921739 | SNURF///SNRPN |
| 203381_s_at | 2.3327772 | APOE                    | 210105_s_at | -3.316063  | FYN           |
| 203074_at   | 2.3301863 | ANXA8L1///ANXA8         | 214085_x_at | -3.3254088 | GLIPR1        |
| 213707_s_at | 2.3276717 | DLX5                    | 205990_s_at | -3.3452337 | WNT5A         |
| 201849_at   | 2.3233637 | BNIP3                   | 204881_s_at | -3.3508429 | UGCG          |
| 202113_s_at | 2.3085771 | SNX2                    | 208850_s_at | -3.3597248 | THY1          |
| 202263_at   | 2.3058001 | CYB5R1                  | 203108_at   | -3.4053548 | GPRC5A        |

|             |           |           |             |            |                      |
|-------------|-----------|-----------|-------------|------------|----------------------|
| 212415_at   | 2.3005972 | septin 6  | 212646_at   | -3.4343153 | RFTN1                |
| 221802_s_at | 2.2994673 | SHTN1     | 212386_at   | -3.4347254 | TCF4                 |
| 218170_at   | 2.2863485 | ISOC1     | 203083_at   | -3.4452165 | THBS2                |
| 220138_at   | 2.2779845 | HAND1     | 204017_at   | -3.4490302 | KDEL3                |
| 209806_at   | 2.2690863 | HIST1H2BK | 202998_s_at | -3.4534356 | LOXL2                |
| 210827_s_at | 2.2687129 | ELF3      | 221269_s_at | -3.4677147 | SH3BGRL3             |
| 205632_s_at | 2.2514636 | PIP5K1B   | 209094_at   | -3.4734053 | DDAH1                |
| 221664_s_at | 2.2480754 | F11R      | 201860_s_at | -3.4782946 | PLAT                 |
| 201272_at   | 2.2322946 | AKR1B1    | 201995_at   | -3.4925526 | EXT1                 |
| 215177_s_at | 2.2267281 | ITGA6     | 201300_s_at | -3.4953301 | PRNP                 |
| 210859_x_at | 2.2265339 | CLN3      | 204475_at   | -3.4999821 | MMP1                 |
| 205000_at   | 2.2177618 | DDX3Y     | 202096_s_at | -3.5054547 | TSPO                 |
| 218499_at   | 2.2166675 | STK26     | 213069_at   | -3.5102396 | HEG1                 |
| 203124_s_at | 2.2166299 | SLC11A2   | 204337_at   | -3.5129535 | RGS4                 |
| 209710_at   | 2.2154082 | GATA2     | 202732_at   | -3.5926168 | PKIG                 |
| 204044_at   | 2.2114613 | QPRT      | 201136_at   | -3.6063411 | PLP2                 |
| 217707_x_at | 2.2020828 | SMARCA2   | 206414_s_at | -3.6613716 | ASAP2                |
| 35148_at    | 2.191809  | TJP3      | 207480_s_at | -3.6771302 | MEIS2                |
| 201236_s_at | 2.1877629 | BTG2      | 213906_at   | -3.7004299 | MYBL1                |
| 47069_at    | 2.1763575 | PRR5      | 201540_at   | -3.7533218 | FHL1                 |
| 214369_s_at | 2.1515952 | RASGRP2   | 202350_s_at | -3.7913589 | LOC100506558///MATN2 |
| 221841_s_at | 2.1439636 | KLF4      | 209386_at   | -3.8089674 | TM4SF1               |
| 216092_s_at | 2.1428528 | SLC7A8    | 204602_at   | -3.8090388 | DKK1                 |
| 206117_at   | 2.1221184 | TPM1      | 202458_at   | -3.8100343 | PRSS23               |
| 204484_at   | 2.088286  | PIK3C2B   | 218025_s_at | -3.8435326 | ECI2                 |
| 221609_s_at | 2.0784872 | WNT6      | 212724_at   | -3.8612036 | RND3                 |
| 201801_s_at | 2.0778809 | SLC29A1   | 201431_s_at | -3.8790028 | DPYSL3               |
| 219761_at   | 2.0662018 | CLEC1A    | 201470_at   | -3.9044204 | GSTO1                |
| 204400_at   | 2.0615216 | EFS       | 202555_s_at | -3.9495746 | MYLK                 |
| 206385_s_at | 2.0608787 | ANK3      | 207039_at   | -3.9548912 | CDKN2A               |
| 218731_s_at | 2.0601132 | VWA1      | 202363_at   | -3.9622499 | SPOCK1               |
| 218507_at   | 2.0556559 | HILPDA    | 217728_at   | -4.0059936 | S100A6               |
| 219147_s_at | 2.0455625 | NMRK1     | 204083_s_at | -4.0247761 | TPM2                 |
| 201811_x_at | 2.0454916 | SH3BP5    | 209290_s_at | -4.0489231 | NFIB                 |

|             |           |          |             |            |          |
|-------------|-----------|----------|-------------|------------|----------|
| 201998_at   | 2.0285112 | ST6GAL1  | 202766_s_at | -4.0746809 | FBN1     |
| 201015_s_at | 2.0156519 | JUP      | 213258_at   | -4.1939966 | TFPI     |
| 204717_s_at | 2.0072799 | SLC29A2  | 201744_s_at | -4.2151951 | LUM      |
| 211795_s_at | 2.0044933 | FYB      | 211959_at   | -4.2248976 | IGFBP5   |
| 204984_at   | 1.9947143 | GPC4     | 201666_at   | -4.2618106 | TIMP1    |
| 218346_s_at | 1.9855101 | SESN1    | 201508_at   | -4.3243196 | IGFBP4   |
| 202449_s_at | 1.982758  | RXRA     | 212190_at   | -4.3623718 | SERPINE2 |
| 201403_s_at | 1.9818084 | MGST3    | 218468_s_at | -4.3635211 | GREM1    |
| 201417_at   | 1.9797076 | SOX4     | 209651_at   | -4.3866402 | TGFB111  |
| 202890_at   | 1.9780349 | MAP7     | 201058_s_at | -4.3904809 | MYL9     |
| 205864_at   | 1.9744383 | SLC7A4   | 209278_s_at | -4.4279892 | TFPI2    |
| 204515_at   | 1.9721103 | HSD3B1   | 201669_s_at | -4.4639047 | MARCKS   |
| 203775_at   | 1.9642719 | SLC25A13 | 201667_at   | -4.5339402 | GJA1     |
| 215017_s_at | 1.9600482 | FNBP1L   | 203060_s_at | -4.5618747 | PAPSS2   |
| 33323_r_at  | 1.956688  | SFN      | 214247_s_at | -4.6229345 | DKK3     |
| 212136_at   | 1.9456735 | ATP2B4   | 201952_at   | -4.6557027 | ALCAM    |
| 202023_at   | 1.9436104 | EFNA1    | 210220_at   | -4.668718  | FZD2     |
| 44783_s_at  | 1.9405923 | HEY1     | 208789_at   | -4.6915474 | PTRF     |
| 208474_at   | 1.9332574 | CLDN6    | 203570_at   | -4.714006  | LOXL1    |
| 202085_at   | 1.9233907 | TJP2     | 203729_at   | -4.7857216 | EMP3     |
| 205180_s_at | 1.9148941 | ADAM8    | 201506_at   | -4.8173403 | TGFBI    |
| 219763_at   | 1.9143253 | DENND1A  | 212233_at   | -4.8881178 | MAP1B    |
| 208579_x_at | 1.9128455 | H2BFS    | 210809_s_at | -4.8989316 | POSTN    |
| 202295_s_at | 1.901602  | CTSH     | 212667_at   | -4.9114664 | SPARC    |
| 209122_at   | 1.8952234 | PLIN2    | 221729_at   | -4.9244534 | COL5A2   |
| 219316_s_at | 1.8903365 | FLVCR2   | 206157_at   | -4.9822934 | PTX3     |
| 213624_at   | 1.8878642 | SMPDL3A  | 201105_at   | -4.9882452 | LGALS1   |
| 204217_s_at | 1.8768499 | RTN2     | 201859_at   | -5.1533652 | SRGN     |
| 202625_at   | 1.8473937 | LYN      | 202976_s_at | -5.2559531 | RHOBTB3  |
| 212919_at   | 1.8392118 | DCP2     | 212063_at   | -5.2644583 | CD44     |
| 220289_s_at | 1.8370174 | AIM1L    | 209101_at   | -5.3922257 | CTGF     |
| 209848_s_at | 1.8369636 | PMEL     | 201163_s_at | -5.4451343 | IGFBP7   |
| 204224_s_at | 1.8252385 | GCH1     | 200600_at   | -5.4679768 | MSN      |
| 215785_s_at | 1.8245996 | CYFIP2   | 205547_s_at | -5.625041  | TAGLN    |

|             |           |         |             |            |                     |
|-------------|-----------|---------|-------------|------------|---------------------|
| 201549_x_at | 1.8178212 | KDM5B   | 202016_at   | -5.7484468 | MEST                |
| 222035_s_at | 1.8175067 | PAPOLA  | 201387_s_at | -5.76438   | UCHL1               |
| 219863_at   | 1.8169089 | HERC5   | 202686_s_at | -5.8124314 | AXL                 |
| 216929_x_at | 1.8077177 | ABO     | 202237_at   | -5.8740511 | LOC101928916///NNMT |
| 219355_at   | 1.8050843 | CXorf57 | 202310_s_at | -5.9427998 | COL1A1              |
| 222240_s_at | 1.8042456 | ISYNA1  | 209118_s_at | -5.969484  | TUBA1A              |
| 212841_s_at | 1.7980905 | PPFIBP2 | 215076_s_at | -6.4522917 | COL3A1              |
| 208296_x_at | 1.7942368 | TNFAIP8 | 201426_s_at | -6.6674864 | VIM                 |
| 203225_s_at | 1.7939803 | RFK     | 208782_at   | -6.906946  | FSTL1               |

---

**Supplementary Table 2. LogFC of 140 candidate DEMs from GSE32346 and GSE130489 in choriocarcinoma.**

| <b>DEMs</b>             | <b>LogFC<br/>(GSE130489)</b> | <b>logFC<br/>(GSE32346)</b> | <b>DEMs</b>               | <b>logFC<br/>(GSE130489)</b> | <b>logFC<br/>(GSE32346)</b> |
|-------------------------|------------------------------|-----------------------------|---------------------------|------------------------------|-----------------------------|
| <b>Upregulated DEMs</b> |                              |                             | <b>Downregulated DEMs</b> |                              |                             |
| hsa-miR-331-3p          | 3.97                         | 3.83988                     | hsa-miR-522               | -12.1                        | -13.43924                   |
| hsa-miR-433             | 11.3                         | 13.90422                    | hsa-miR-517c              | -17.4                        | -16.0155                    |
| hsa-let-7e              | 6.43                         | 6.78341                     | hsa-miR-518d-5p           | -14.1                        | -13.738                     |
| hsa-miR-574-3p          | 4.82                         | 5.15491                     | hsa-miR-516a-5p           | -11.6                        | -11.42127                   |
| hsa-let-7f              | 13.1                         | 15.07193                    | hsa-miR-519c-3p           | -14.2                        | -14.686                     |
| hsa-miR-126             | 4.88                         | 5.37099                     | hsa-miR-520f              | -13.2                        | -12.70239                   |
| hsa-miR-145             | 2.84                         | 3.38113                     | hsa-miR-520a-5p           | -12.3                        | -12.43449                   |
| hsa-miR-132             | 3.72                         | 4.13704                     | hsa-miR-520g              | -13.6                        | -12.32072                   |
| hsa-miR-340             | 4.71                         | 5.39538                     | hsa-miR-483-5p            | -4.89                        | -5.10129                    |
| hsa-miR-410             | 10.9                         | 12.38457                    | hsa-miR-517a              | -15                          | -16.07375                   |
| hsa-miR-369-3p          | 6.61                         | 7.49074                     | hsa-miR-375               | -11.1                        | -10.74841                   |
| hsa-miR-935             | 17.1                         | 12.36823                    | hsa-miR-515-3p            | -14.4                        | -13.72839                   |
| hsa-miR-147             | 4.24                         | 5.97349                     | hsa-miR-520e              | -6.73                        | -6.89354                    |
| hsa-miR-125b            | 8.39                         | 9.04702                     | hsa-miR-519d              | -12.7                        | -14.00106                   |
| hsa-miR-411             | 13.7                         | 15.58015                    | hsa-miR-516b              | -11.8                        | -10.98254                   |
| hsa-let-7c              | 8.9                          | 10.94958                    | hsa-miR-518c              | -13.4                        | -13.55799                   |
| hsa-miR-301a            | 5.74                         | 6.20744                     | hsa-miR-526b              | -14.4                        | -13.92791                   |
| hsa-miR-15b             | 3.79                         | 4.39013                     | hsa-miR-518f              | -13                          | -12.68424                   |
| hsa-miR-100             | 9                            | 9.66957                     | hsa-miR-515-5p            | -15.7                        | -15.02586                   |
| hsa-miR-148b            | 3.18                         | 3.75634                     | hsa-miR-519e              | -13                          | -12.65281                   |
| hsa-let-7b              | 16.9                         | 18.43336                    | hsa-miR-934               | -6.98                        | -18.84203                   |
| hsa-miR-642             | 5.44                         | 6.12036                     | hsa-miR-520a-3p           | -13.6                        | -12.97076                   |
| hsa-miR-218             | 8.36                         | 8.48809                     | hsa-miR-517               | -12.4                        | -15.95335                   |
| hsa-miR-758             | 12.3                         | 13.20144                    | hsa-miR-372               | -16.2                        | -15.84692                   |
| hsa-let-7d              | 7.81                         | 8.49914                     | hsa-miR-518e              | -15.9                        | -17.05001                   |
| hsa-miR-127-3p          | 13.4                         | 16.25119                    | hsa-miR-512-5p            | -15.6                        | -15.28283                   |
| hsa-miR-337-5p          | 11.3                         | 12.68994                    | hsa-miR-521               | -10                          | -9.80591                    |
| hsa-miR-183             | 2.56                         | 3.29083                     | hsa-miR-524-5p            | -6.38                        | -6.2933                     |
| hsa-miR-876-5p          | 5.38                         | 7.47904                     | hsa-miR-519a              | -14.2                        | -15.12709                   |



|                    |      |          |                |       |           |
|--------------------|------|----------|----------------|-------|-----------|
| hsa-miR-99a        | 8.94 | 8.9486   | hsa-miR-517b   | -17.4 | -17.65231 |
| hsa-miR-125a-5p    | 3.28 | 3.3682   | hsa-miR-520b   | -13.4 | -13.2038  |
| hsa-miR-338-3p     | 10.6 | 11.10964 | hsa-miR-373    | -10.7 | -10.5139  |
| hsa-miR-133b       | 8.48 | 7.96669  | hsa-miR-371-3p | -13.2 | -12.81666 |
| hsa-miR-330-3p     | 2.87 | 3.54234  | hsa-miR-525-3p | -15.7 | -15.25869 |
| hsa-miR-598        | 13.3 | 13.88619 | hsa-miR-523    | -11   | -10.30649 |
| hsa-miR-329        | 8.71 | 13.32066 | hsa-miR-525-5p | -11.6 | -11.09259 |
| hsa-miR-744        | 2.7  | 3.80686  | hsa-miR-512-3p | -18   | -20.48689 |
| hsa-miR-361-5p     | 2.51 | 2.98871  | hsa-miR-518b   | -13.1 | -14.76404 |
| hsa-miR-301b       | 3.77 | 4.49966  |                |       |           |
| hsa-miR-345        | 3.3  | 3.86239  |                |       |           |
| hsa-miR-146b-5p    | 4.01 | 4.15219  |                |       |           |
| hsa-miR-324-5p     | 6.19 | 7.26626  |                |       |           |
| hsa-miR-370        | 15.6 | 16.56394 |                |       |           |
| hsa-miR-873        | 7.49 | 8.98087  |                |       |           |
| hsa-miR-485-3p     | 12.2 | 13.75477 |                |       |           |
| hsa-miR-194        | 3.59 | 5.14564  |                |       |           |
| hsa-miR-886-5p     | 8.54 | 9.05811  |                |       |           |
| hsa-miR-487a       | 9.64 | 10.68054 |                |       |           |
| hsa-miR-138        | 8.39 | 8.06464  |                |       |           |
| hsa-miR-296-5p     | 4.66 | 4.89705  |                |       |           |
| hsa-miR-222        | 4.92 | 5.24896  |                |       |           |
| hsa-miR-539        | 15.4 | 17.06524 |                |       |           |
| hsa-miR-369-5p     | 7.94 | 8.81589  |                |       |           |
| hsa-miR-99b        | 4.2  | 4.95951  |                |       |           |
| hsa-miR-544        | 4.61 | 6.49099  |                |       |           |
| hsa-miR-376a       | 11.3 | 12.00286 |                |       |           |
| hsa-let-7g-4395393 | 8.54 | 10.53196 |                |       |           |
| hsa-miR-143        | 9.03 | 11.04966 |                |       |           |
| hsa-miR-495        | 13.6 | 14.24634 |                |       |           |
| hsa-miR-134        | 15.5 | 16.13129 |                |       |           |
| hsa-miR-140-5p     | 3.18 | 3.37244  |                |       |           |
| hsa-miR-10a        | 15.1 | 16.23664 |                |       |           |
| hsa-miR-654-5p     | 12.7 | 13.26434 |                |       |           |

|                |      |          |
|----------------|------|----------|
| hsa-miR-487b   | 12.1 | 13.57731 |
| hsa-miR-889    | 12.6 | 13.64579 |
| hsa-miR-21     | 4.2  | 4.72501  |
| hsa-miR-376b   | 5.61 | 7.99429  |
| hsa-miR-221    | 5.04 | 6.10226  |
| hsa-miR-541    | 11.7 | 11.87434 |
| hsa-miR-615-3p | 14.8 | 15.45659 |
| hsa-miR-196b   | 13.3 | 12.87756 |
| hsa-miR-10b    | 16.5 | 16.86834 |
| hsa-miR-133a   | 3.36 | 4.96634  |
| has-miR-155    | 15.8 | 17.46989 |
| hsa-miR-128    | 2.8  | 3.83271  |
| hsa-miR-24     | 4.23 | 4.20163  |
| hsa-miR-137    | 14   | 15.11784 |
| hsa-miR-328    | 5.47 | 6.41962  |
| hsa-miR-146a   | 5.61 | 7.64234  |
| hsa-miR-655    | 11.7 | 14.35806 |
| hsa-miR-30b    | 2.09 | 2.64874  |
| hsa-miR-409-5p | 10.6 | 11.78454 |
| hsa-miR-382    | 15.6 | 16.72119 |
| hsa-miR-493    | 8.53 | 8.49749  |
| hsa-miR-29a    | 5.41 | 5.46323  |
| hsa-miR-876-3p | 5.31 | 7.48709  |
| hsa-miR-192    | 3.41 | 4.16486  |
| hsa-miR-376c   | 14.5 | 17.31459 |
| hsa-miR-153    | 3.58 | 4.97439  |
| hsa-miR-28-5p  | 3.31 | 3.81311  |
| hsa-miR-496    | 5.14 | 6.98404  |
| hsa-miR-379    | 14.1 | 15.13389 |
| hsa-miR-152    | 13.4 | 16.4739  |
| hsa-miR-98     | 11.9 | 10.03796 |
| hsa-miR-299-5p | 11.1 | 13.19404 |
| hsa-miR-29b-3p | 5.83 | 6.60099  |
| hsa-miR-323-3p | 7.96 | 10.27258 |

|                |      |         |
|----------------|------|---------|
| hsa-miR-423-5p | 2.81 | 4.06328 |
| hsa-miR-103    | 3.77 | 4.40215 |
| hsa-miR-589    | 3.12 | 4.68261 |
| hsa-miR-324-3p | 5.21 | 5.93032 |

---

Abbreviations: DEMs, differentially expressed miRNAs.

**Supplementary Table 3. GO analysis of candidate DEGs in choriocarcinoma.**

| Term                           | Description                                          | Count | P-Value  | Corrected P-value |
|--------------------------------|------------------------------------------------------|-------|----------|-------------------|
| <b>GO Biological Processes</b> |                                                      |       |          |                   |
| GO:0000902                     | cell morphogenesis                                   | 65    | 7.75E-14 | 3.41E-12          |
| GO:0000904                     | cell morphogenesis involved in differentiation       | 49    | 2.36E-11 | 7.09E-10          |
| GO:0001568                     | blood vessel development                             | 53    | 3.53E-15 | 1.70E-13          |
| GO:0001932                     | regulation of protein phosphorylation                | 63    | 3.22E-07 | 2.26E-06          |
| GO:0004672                     | protein kinase activity                              | 56    | 2.79E-07 | 2.23E-06          |
| GO:0008233                     | peptidase activity                                   | 45    | 3.06E-05 | 6.11E-05          |
| GO:0008284                     | positive regulation of cell population proliferation | 47    | 1.10E-07 | 1.21E-06          |
| GO:0008285                     | negative regulation of cell population proliferation | 47    | 1.82E-11 | 5.64E-10          |
| GO:0009790                     | embryo development                                   | 62    | 2.71E-12 | 1.03E-10          |
| GO:0009887                     | animal organ morphogenesis                           | 75    | 9.90E-19 | 5.84E-17          |
| GO:0009968                     | negative regulation of signal transduction           | 63    | 1.99E-09 | 4.38E-08          |
| GO:0010648                     | negative regulation of cell communication            | 66    | 9.23E-09 | 1.66E-07          |
| GO:0016301                     | kinase activity                                      | 65    | 7.73E-08 | 9.27E-07          |
| GO:0016477                     | cell migration                                       | 96    | 1.62E-21 | 1.02E-19          |
| GO:0023014                     | signal transduction by protein phosphorylation       | 44    | 3.02E-06 | 1.51E-05          |
| GO:0023057                     | negative regulation of signaling                     | 66    | 9.77E-09 | 1.66E-07          |
| GO:0030198                     | extracellular matrix organization                    | 42    | 5.07E-18 | 2.84E-16          |
| GO:0030334                     | regulation of cell migration                         | 64    | 1.94E-17 | 1.05E-15          |
| GO:0030855                     | epithelial cell differentiation                      | 49    | 2.69E-11 | 7.81E-10          |
| GO:0035239                     | tube morphogenesis                                   | 63    | 3.32E-17 | 1.76E-15          |
| GO:0035295                     | tube development                                     | 77    | 1.31E-20 | 8.14E-19          |
| GO:0042127                     | regulation of cell population proliferation          | 85    | 1.26E-13 | 5.43E-12          |
| GO:0043067                     | regulation of programmed cell death                  | 68    | 6.32E-08 | 8.85E-07          |
| GO:0043069                     | negative regulation of programmed cell death         | 45    | 6.97E-07 | 4.18E-06          |
| GO:0043549                     | regulation of kinase activity                        | 52    | 4.32E-10 | 1.12E-08          |
| GO:0045595                     | regulation of cell differentiation                   | 93    | 4.02E-14 | 1.81E-12          |
| GO:0045597                     | positive regulation of cell differentiation          | 59    | 4.99E-12 | 1.79E-10          |
| GO:0045859                     | regulation of protein kinase activity                | 47    | 1.66E-09 | 3.82E-08          |

|                               |                                                    |     |             |             |
|-------------------------------|----------------------------------------------------|-----|-------------|-------------|
| GO:0048468                    | cell development                                   | 109 | 5.69E-17    | 2.90E-15    |
| GO:0048513                    | animal organ development                           | 166 | 2.61E-23    | 1.67E-21    |
| GO:0048514                    | blood vessel morphogenesis                         | 48  | 2.73E-14    | 1.26E-12    |
| GO:0048585                    | negative regulation of response to stimulus        | 80  | 1.39E-11    | 4.59E-10    |
| GO:0048598                    | embryonic morphogenesis                            | 44  | 5.59E-12    | 1.96E-10    |
| GO:0048729                    | tissue morphogenesis                               | 57  | 2.97E-18    | 1.72E-16    |
| GO:0051093                    | negative regulation of developmental process       | 57  | 4.05E-11    | 1.13E-09    |
| GO:0051094                    | positive regulation of developmental process       | 80  | 1.49E-15    | 7.29E-14    |
| GO:0051248                    | negative regulation of protein metabolic process   | 54  | 6.35E-08    | 8.26E-07    |
| GO:0051270                    | regulation of cellular component movement          | 71  | 4.34E-18    | 2.47E-16    |
| GO:0051338                    | regulation of transferase activity                 | 56  | 4.55E-10    | 1.14E-08    |
| GO:0060284                    | regulation of cell development                     | 51  | 1.33E-08    | 2.12E-07    |
| GO:0060429                    | epithelium development                             | 81  | 7.92E-18    | 4.36E-16    |
| GO:0060548                    | negative regulation of cell death                  | 49  | 2.44E-07    | 2.20E-06    |
| GO:0070848                    | response to growth factor                          | 51  | 1.96E-13    | 8.21E-12    |
| GO:0071363                    | cellular response to growth factor stimulus        | 49  | 5.53E-13    | 2.21E-11    |
| GO:0072359                    | circulatory system development                     | 72  | 5.59E-17    | 2.91E-15    |
| GO:2000026                    | regulation of multicellular organismal development | 113 | 3.66E-20    | 2.23E-18    |
| GO:2000145                    | regulation of cell motility                        | 69  | 5.77E-19    | 3.46E-17    |
| GO:2000147                    | positive regulation of cell motility               | 41  | 9.86E-12    | 3.35E-10    |
| <b>GO Cellular Components</b> |                                                    |     |             |             |
| GO:0005604                    | basement membrane                                  | 14  | 1.57E-08    | 1.57E-08    |
| GO:0005615                    | extracellular space                                | 149 | 8.71E-21    | 8.71E-21    |
| GO:0005911                    | cell-cell junction                                 | 25  | 8.92E-05    | 8.92E-05    |
| GO:0005925                    | focal adhesion                                     | 23  | 3.28E-05    | 3.28E-05    |
| GO:0009897                    | external side of plasma membrane                   | 18  | 0.005134072 | 0.005134072 |
| GO:0016323                    | basolateral plasma membrane                        | 25  | 3.90E-11    | 3.90E-11    |
| GO:0016324                    | apical plasma membrane                             | 22  | 4.86E-06    | 4.86E-06    |
| GO:0030017                    | sarcomere                                          | 12  | 0.001656909 | 0.001656909 |
| GO:0030141                    | secretory granule                                  | 38  | 2.88E-05    | 2.88E-05    |
| GO:0031012                    | extracellular matrix                               | 52  | 9.92E-20    | 9.92E-20    |
| GO:0031091                    | platelet alpha granule                             | 13  | 6.88E-08    | 6.88E-08    |

|            |                                          |     |             |             |
|------------|------------------------------------------|-----|-------------|-------------|
| GO:0031093 | platelet alpha granule lumen             | 10  | 1.63E-06    | 1.63E-06    |
| GO:0031253 | cell projection membrane                 | 17  | 0.001844487 | 0.001844487 |
| GO:0031674 | I band                                   | 10  | 0.001095986 | 0.001095986 |
| GO:0034774 | secretory granule lumen                  | 19  | 1.32E-04    | 1.32E-04    |
| GO:0043292 | contractile fiber                        | 13  | 0.001839951 | 0.001839951 |
| GO:0043296 | apical junction complex                  | 13  | 1.59E-05    | 1.59E-05    |
| GO:0045121 | membrane raft                            | 23  | 1.39E-06    | 1.39E-06    |
| GO:0062023 | collagen-containing extracellular matrix | 46  | 6.93E-20    | 6.93E-20    |
| GO:0070062 | extracellular exosome                    | 103 | 6.40E-16    | 6.40E-16    |
| GO:0070160 | tight junction                           | 12  | 2.36E-05    | 2.36E-05    |
| GO:0070161 | anchoring junction                       | 44  | 4.10E-08    | 4.10E-08    |
| GO:0098552 | side of membrane                         | 27  | 5.64E-04    | 5.64E-04    |
| GO:0098590 | plasma membrane region                   | 62  | 1.88E-10    | 1.88E-10    |
| GO:1903561 | extracellular vesicle                    | 105 | 1.19E-16    | 1.19E-16    |

### GO Molecular Functions

|            |                                                                             |    |             |             |
|------------|-----------------------------------------------------------------------------|----|-------------|-------------|
| GO:0001228 | DNA-binding transcription activator activity,<br>RNA polymerase II-specific | 22 | 0.001037712 | 0.001037712 |
| GO:0004175 | endopeptidase activity                                                      | 40 | 5.64E-06    | 6.20E-05    |
| GO:0004672 | protein kinase activity                                                     | 56 | 3.20E-07    | 4.80E-06    |
| GO:0004674 | protein serine/threonine kinase activity                                    | 38 | 7.44E-05    | 3.72E-04    |
| GO:0004857 | enzyme inhibitor activity                                                   | 23 | 2.77E-05    | 2.21E-04    |
| GO:0008233 | peptidase activity                                                          | 45 | 3.31E-05    | 2.32E-04    |
| GO:0008234 | cysteine-type peptidase activity                                            | 22 | 5.31E-04    | 0.001593772 |
| GO:0016301 | kinase activity                                                             | 65 | 9.44E-08    | 1.60E-06    |
| GO:0016773 | phosphotransferase activity, alcohol group as<br>acceptor                   | 61 | 1.30E-07    | 2.08E-06    |
| GO:0033674 | positive regulation of kinase activity                                      | 35 | 1.27E-06    | 1.66E-05    |
| GO:0043085 | positive regulation of catalytic activity                                   | 71 | 9.91E-10    | 2.18E-08    |
| GO:0043086 | negative regulation of catalytic activity                                   | 41 | 2.72E-06    | 3.27E-05    |
| GO:0043549 | regulation of kinase activity                                               | 52 | 5.83E-10    | 1.40E-08    |
| GO:0045859 | regulation of protein kinase activity                                       | 47 | 2.19E-09    | 4.37E-08    |
| GO:0045860 | positive regulation of protein kinase activity                              | 30 | 1.17E-05    | 1.06E-04    |
| GO:0051336 | regulation of hydrolase activity                                            | 60 | 6.87E-08    | 1.24E-06    |
| GO:0051338 | regulation of transferase activity                                          | 56 | 5.99E-10    | 1.38E-08    |

|            |                                                        |    |          |             |
|------------|--------------------------------------------------------|----|----------|-------------|
| GO:0051345 | positive regulation of hydrolase activity              | 34 | 1.41E-04 | 5.66E-04    |
| GO:0051346 | negative regulation of hydrolase activity              | 23 | 6.50E-04 | 0.001300171 |
| GO:0051347 | positive regulation of transferase activity            | 39 | 3.33E-07 | 4.66E-06    |
| GO:0052547 | regulation of peptidase activity                       | 34 | 1.06E-09 | 2.23E-08    |
| GO:0052548 | regulation of endopeptidase activity                   | 32 | 2.67E-09 | 5.07E-08    |
| GO:0070011 | peptidase activity, acting on L-amino acid peptides    | 43 | 6.26E-05 | 3.75E-04    |
| GO:0071900 | regulation of protein serine/threonine kinase activity | 29 | 6.92E-06 | 6.92E-05    |

---

**Supplementary Table 4. KEGG Pathway analysis of candidate DEGs in choriocarcinoma.**

| Pathway                    | ID         | Database     | Gene count | P-value     | Corrected P-value | Genes                                                                                                                                               |
|----------------------------|------------|--------------|------------|-------------|-------------------|-----------------------------------------------------------------------------------------------------------------------------------------------------|
| MAPK signaling pathway     | KEGG:04010 | KEGG pathway | 15         | 0.013728734 | 0.041186203       | BDNF, DUSP1, EFNA1, ERBB3, FGF2, FGFR2, HSPB1, JUN, MET, PDGFC, PGF, PRKCA, RASGRP2, TGFB2, VEGFC                                                   |
| Ras signaling pathway      | KEGG:04014 | KEGG pathway | 14         | 0.005046425 | 0.045417827       | BDNF, EFNA1, FGF2, FGFR2, GNG11, MET, PAK6, PDGFC, PGF, PLAAT3, PRKCA, RALBP1, RASGRP2, VEGFC                                                       |
| Rap1 signaling pathway     | KEGG:04015 | KEGG pathway | 13         | 0.00354277  | 0.046056015       | CDH1, EFNA1, FGF2, FGFR2, FYB1, MET, PDGFC, PFN2, PGF, PRKCA, RASGRP2, THBS1, VEGFC                                                                 |
| PI3K-Akt signaling pathway | KEGG:04151 | KEGG pathway | 22         | 2.11E-04    | 0.0035847         | BDNF, CCNE1, COL1A1, COL6A1, COL6A2, COL9A3, EFNA1, ERBB3, FGF2, FGFR2, FN1, GNG11, ITGA3, ITGA6, MET, PDGFC, PGF, PRKCA, RXRA, THBS1, THBS2, VEGFC |
| Wnt signaling pathway      | KEGG:04310 | KEGG pathway | 10         | 0.009450501 | 0.037802002       | DKK1, FZD2, FZD5, FZD6, GPC4, JUN, PRKCA, TCF7L2, WNT5A, WNT6                                                                                       |
| Axon guidance              | KEGG:04360 | KEGG pathway | 11         | 0.008116756 | 0.048700534       | DPYSL2, EFNA1, FYN, MET, MYL9, PAK6, PLXNA2, PRKCA, SEMA3C, SEMA4C, WNT5A                                                                           |
| Hippo signaling pathway    | KEGG:04390 | KEGG pathway | 10         | 0.008321645 | 0.041608225       | CCN2, CDH1, FZD2, FZD5, FZD6, SERPINE1, TCF7L2, TGFB2, WNT5A, WNT6                                                                                  |
| Focal adhesion             | KEGG:04510 | KEGG pathway | 19         | 1.05E-06    | 2.31E-05          | COL1A1, COL6A1, COL6A2, COL9A3, FN1, FYN, ITGA3, ITGA6, JUN, MET, MYL9, MYLK, PAK6, PDGFC, PGF, PRKCA, THBS1, THBS2, VEGFC                          |
| ECM-receptor interaction   | KEGG:04512 | KEGG pathway | 10         | 9.63E-05    | 0.001733155       | CD44, COL1A1, COL6A1, COL6A2, COL9A3, FN1, ITGA3, ITGA6, THBS1, THBS2                                                                               |
| Cell adhesion molecules    | KEGG:04514 | KEGG pathway | 10         | 0.005549083 | 0.03884358        | ALCAM, CADM1, CDH1, CLDN4, CLDN6, CLDN7, F11R, HLA-A, ITGA6, SDC2                                                                                   |



|                                                          |            |              |    |             |             |                                                                                                                                                                                                                           |
|----------------------------------------------------------|------------|--------------|----|-------------|-------------|---------------------------------------------------------------------------------------------------------------------------------------------------------------------------------------------------------------------------|
| Tight junction                                           | KEGG:04530 | KEGG pathway | 11 | 0.004901865 | 0.049018649 | CLDN4, CLDN6, CLDN7, EPB41L4B, F11R, JUN, MSN, MYL9, TJP2, TJP3, TUBA1A                                                                                                                                                   |
| Signaling pathways regulating pluripotency of stem cells | KEGG:04550 | KEGG pathway | 10 | 0.004357765 | 0.047935413 | DLX5, FGF2, FGFR2, FZD2, FZD5, FZD6, HAND1, KLF4, WNT5A, WNT6                                                                                                                                                             |
| Regulation of actin cytoskeleton                         | KEGG:04810 | KEGG pathway | 14 | 0.001428897 | 0.021433459 | CYFIP2, FGF2, FGFR2, FN1, ITGA3, ITGA6, MSN, MYL9, MYLK, PAK6, PDGFC, PFN2, PIP5K1B, TMSB4X                                                                                                                               |
| Cushing syndrome                                         | KEGG:04934 | KEGG pathway | 11 | 0.002525991 | 0.035363878 | CCNE1, CDKN2A, CDKN2C, CYP11A1, FZD2, FZD5, FZD6, HSD3B1, TCF7L2, WNT5A, WNT6                                                                                                                                             |
| Pathogenic Escherichia coli infection                    | KEGG:05130 | KEGG pathway | 10 | 0.044562328 | 0.044562328 | CLDN4, CLDN6, CLDN7, CYFIP2, FYN, JUN, LYN, TNFSF10, TUBA1A, TUBB2A                                                                                                                                                       |
| Human papillomavirus infection                           | KEGG:05165 | KEGG pathway | 18 | 0.00391393  | 0.046967161 | CCNE1, COL1A1, COL6A1, COL6A2, COL9A3, FN1, FZD2, FZD5, FZD6, HEY1, HLA-A, ITGA3, ITGA6, TCF7L2, THBS1, THBS2, WNT5A, WNT6                                                                                                |
| Pathways in cancer                                       | KEGG:05200 | KEGG pathway | 33 | 3.20E-06    | 6.39E-05    | CCNE1, CDH1, CDKN2A, CEBPA, CSF2RA, FGF2, FGFR2, FN1, FZD2, FZD5, FZD6, GNG11, GSTO1, HEY1, ITGA3, ITGA6, JUN, JUP, MET, MGST3, MMP1, PGF, PMAIP1, PPARG, PRKCA, RALBP1, RASGRP2, RXRA, TCF7L2, TGFB2, VEGFC, WNT5A, WNT6 |
| Proteoglycans in cancer                                  | KEGG:05205 | KEGG pathway | 19 | 1.65E-06    | 3.47E-05    | ANK3, CD44, COL1A1, ERBB3, FGF2, FN1, FZD2, FZD5, FZD6, LUM, MET, MSN, PRKCA, SDC2, TGFB2, THBS1, TIMP3, WNT5A, WNT6                                                                                                      |
| MicroRNAs in cancer                                      | KEGG:05206 | KEGG pathway | 17 | 0.005371163 | 0.042969303 | CCNE1, CD44, CDKN2A, DNMT3B, EFNA1, ERBB3, MARCKS, MET, PRKCA, SLC7A1, SOX4, TGFB2, THBS1, TIMP3, TPM1, VIM, ZFPM2                                                                                                        |
| Hepatocellular carcinoma                                 | KEGG:05225 | KEGG pathway | 13 | 4.65E-04    | 0.007436564 | CDKN2A, FZD2, FZD5, FZD6, GSTO1, MET, MGST3, PRKCA, SMARCA2,                                                                                                                                                              |

|                |            |              |    |          |          |                                                                                                                            |
|----------------|------------|--------------|----|----------|----------|----------------------------------------------------------------------------------------------------------------------------|
| Gastric cancer | KEGG:05226 | KEGG pathway | 14 | 3.48E-05 | 6.61E-04 | TCF7L2, TGFB2, WNT5A, WNT6<br>CCNE1, CDH1, FGF2, FGFR2, FZD2,<br>FZD5, FZD6, JUP, MET, RXRA, TCF7L2,<br>TGFB2, WNT5A, WNT6 |
|----------------|------------|--------------|----|----------|----------|----------------------------------------------------------------------------------------------------------------------------|

---

**Supplementary Table 5. GO terms and KEGG pathway analysis of 29 hub genes in choriocarcinoma.**

| <b>Term</b>                    | <b>Description</b>                                    | <b>Count</b> | <b>LogP</b> |
|--------------------------------|-------------------------------------------------------|--------------|-------------|
| <b>GO Biological Processes</b> |                                                       |              |             |
| GO:0030198                     | extracellular matrix organization                     | 18           | -26.046     |
| GO:0043687                     | post-translational protein modification               | 12           | -15.141     |
| GO:0002576                     | platelet degranulation                                | 8            | -12.238     |
| GO:0030336                     | negative regulation of cell migration                 | 8            | -8.946      |
| GO:0071363                     | cellular response to growth factor stimulus           | 10           | -8.915      |
| GO:0043408                     | regulation of MAPK cascade                            | 10           | -8.886      |
| GO:0031589                     | cell-substrate adhesion                               | 8            | -8.65       |
| GO:0001501                     | skeletal system development                           | 8            | -7.635      |
| GO:0001503                     | ossification                                          | 7            | -6.865      |
| GO:0016049                     | cell growth                                           | 7            | -6.388      |
| GO:0034284                     | response to monosaccharide                            | 5            | -5.783      |
| GO:0051043                     | regulation of membrane protein ectodomain proteolysis | 3            | -5.766      |
| GO:0007229                     | integrin-mediated signaling pathway                   | 4            | -5.346      |
| GO:0035987                     | endodermal cell differentiation                       | 3            | -4.898      |
| GO:0048545                     | response to steroid hormone                           | 5            | -4.695      |
| GO:0030199                     | collagen fibril organization                          | 3            | -4.629      |
| GO:0034330                     | cell junction organization                            | 6            | -4.169      |
| GO:0022617                     | extracellular matrix disassembly                      | 3            | -4.069      |
| GO:0022604                     | regulation of cell morphogenesis                      | 4            | -3.587      |
| <b>GO Cellular Components</b>  |                                                       |              |             |
| GO:0062023                     | collagen-containing extracellular matrix              | 20           | -29.694     |
| GO:0005788                     | endoplasmic reticulum lumen                           | 17           | -25.917     |
| GO:0031091                     | platelet alpha granule                                | 8            | -13.453     |
| GO:0005581                     | collagen trimer                                       | 4            | -5.721      |
| GO:0098978                     | glutamatergic synapse                                 | 3            | -2.416      |
| <b>GO Molecular Functions</b>  |                                                       |              |             |
| GO:0005201                     | extracellular matrix structural constituent           | 12           | -19.125     |
| GO:0005539                     | glycosaminoglycan binding                             | 10           | -13.722     |
| GO:0005518                     | collagen binding                                      | 6            | -10.143     |

|                     |                                                      |   |         |
|---------------------|------------------------------------------------------|---|---------|
| GO:0019838          | growth factor binding                                | 7 | -10.081 |
| GO:0002020          | protease binding                                     | 5 | -6.66   |
| GO:0008083          | growth factor activity                               | 5 | -6.201  |
| GO:0050840          | extracellular matrix binding                         | 3 | -4.605  |
| <b>KEGG Pathway</b> |                                                      |   |         |
| hsa04512            | ECM-receptor interaction                             | 6 | -9.643  |
| ko05205             | Proteoglycans in cancer                              | 7 | -8.905  |
| ko04933             | AGE-RAGE signaling pathway in diabetic complications | 5 | -7.269  |
| ko04974             | Protein digestion and absorption                     | 4 | -5.662  |
| hsa05200            | Pathways in cancer                                   | 6 | -5.577  |
| ko04390             | Hippo signaling pathway                              | 4 | -4.736  |
| hsa04115            | p53 signaling pathway                                | 3 | -4.309  |

**Supplementary Table 6. The interaction between drugs and hub genes.**

| Gene   | Drug                                       | Sources                                | PMIDs      | Query Score | Interaction Score |
|--------|--------------------------------------------|----------------------------------------|------------|-------------|-------------------|
| COL6A1 | COLLAGENASE<br>CLOSTRIDIUM<br>HISTOLYTICUM | ChEMBLInteractions                     | None found | 0.78        | 1.01              |
| COL6A1 | OCRIPLASMIN                                | ChEMBLInteractions                     | None found | 0.56        | 0.73              |
| COL5A2 | COLLAGENASE<br>CLOSTRIDIUM<br>HISTOLYTICUM | ChEMBLInteractions                     | None found | 0.78        | 1.01              |
| COL5A2 | OCRIPLASMIN                                | ChEMBLInteractions                     | None found | 0.56        | 0.73              |
| CTGF   | PAMREVLUMAB                                | TdgClinicalTrial<br>ChEMBLInteractions | None found | 8.71        | 5.98              |
| CTGF   | ACRIDINE                                   | NCI                                    | 16950763   | 8.71        | 5.98              |
| CTGF   | RAMIPRIL                                   | NCI                                    | 15128880   | 1.74        | 1.2               |
| CTGF   | INOSITOL                                   | NCI                                    | 15560785   | 0.62        | 0.43              |
| CTGF   | 2-METHOXYESTRADI<br>OL                     | NCI                                    | 18292194   | 0.58        | 0.4               |
| CTGF   | PROPRANOLOL                                | NCI                                    | 12691286   | 0.46        | 0.31              |
| CTGF   | ENALAPRIL                                  | NCI                                    | 18812665   | 0.44        | 0.3               |
| CTGF   | VITAMIN E                                  | NCI                                    | 12023009   | 0.41        | 0.28              |
| CTGF   | ANDROSTANOLONE                             | NCI                                    | 11181522   | 0.38        | 0.26              |
| CTGF   | PRASTERONE                                 | NCI                                    | 15675949   | 0.34        | 0.23              |
| TGFB2  | LERDELIMUMAB                               | TdgClinicalTrial<br>ChEMBLInteractions | None found | 8.71        | 28.4              |
| TGFB2  | TRABEDERSEN                                | TdgClinicalTrial                       | None found | 4.36        | 14.2              |
| TGFB2  | BELAGENPUMATUCE<br>L-L                     | TdgClinicalTrial                       | None found | 4.36        | 14.2              |
| TGFB2  | FRESOLIMUMAB                               | TALC<br>ChEMBLInteractions             | None found | 2.9         | 9.47              |
| COL6A2 | COLLAGENASE<br>CLOSTRIDIUM<br>HISTOLYTICUM | ChEMBLInteractions                     | None found | 0.78        | 1.01              |
| COL6A2 | OCRIPLASMIN                                | ChEMBLInteractions                     | None found | 0.56        | 0.73              |

|          |                                            |                              |                                              |      |       |
|----------|--------------------------------------------|------------------------------|----------------------------------------------|------|-------|
| THBS1    | METHYLCELLULOSE                            | NCI                          | 9016860                                      | 4.36 | 7.1   |
| THBS1    | ABT-510                                    | TTD                          | None found                                   | 1.24 | 1.01  |
| THBS1    | VESNARINONE                                | NCI                          | 15356428                                     | 1.24 | 2.03  |
| THBS1    | CORTICOTROPIN                              | NCI                          | 8698834                                      | 0.62 | 1.01  |
| THBS1    | PIOGLITAZONE                               | NCI                          | 17063547                                     | 0.51 | 0.84  |
| THBS1    | SIMVASTATIN                                | NCI                          | 10543307                                     | 0.31 | 0.25  |
| THBS1    | CAMPTOTHECIN                               | NCI                          | 16962673                                     | 0.24 | 0.39  |
| THBS1    | LOVASTATIN                                 | NCI                          | 10543307                                     | 0.19 | 0.32  |
| SPARC    | CALCIUM<br>PHOSPHATE,<br>TRIBASIC          | DrugBank                     | None found                                   | 0.13 | 0.86  |
| SPARC    | CALCIUM CITRATE                            | DrugBank                     | None found                                   | 0.13 | 0.86  |
| COL3A1   | COLLAGENASE<br>CLOSTRIDIUM<br>HISTOLYTICUM | ChEMBLInteractions<br>TEND   | None found                                   | 1.56 | 2.03  |
| COL3A1   | OCRIPLASMIN                                | ChEMBLInteractions           | None found                                   | 0.56 | 0.73  |
| IGFBP3   | MECASERMIN                                 | DrugBank                     | 15777106<br>19627167<br>18363546             | 4.36 | 11.36 |
| IGFBP3   | LONAFARNIB                                 | DrugBank                     | 15494604                                     | 1.24 | 3.25  |
| IGFBP3   | ALITRETINOIN                               | DrugBank                     | 16760641                                     | 0.73 | 1.89  |
| IGFBP3   | CELECOXIB                                  | PharmGKB                     | 22336956                                     | 0.13 | 0.34  |
| IGFBP3   | FLUOROURACIL                               | PharmGKB                     | 20860465                                     | 0.08 | 0.22  |
| SDC2     | SARGRAMOSTIM                               | DrugBank                     | 17139284<br>17016423<br>10734053             | 3.48 | 45.44 |
| SERPINE1 | TIPLASININ                                 | DTC                          | 17276980                                     | 8.71 | 4.21  |
| SERPINE1 | ALEPLASININ                                | ChEMBLInteractions           | None found                                   | 4.36 | 2.1   |
| SERPINE1 | PREMARIN                                   | NCI                          | 8888658                                      | 4.36 | 2.1   |
| SERPINE1 | DIAPLASININ                                | TTD                          | None found                                   | 4.36 | 2.1   |
| SERPINE1 | UROKINASE                                  | DrugBank<br>TdgClinicalTrial | 12709915<br>12785198<br>12745435<br>12642587 | 3.05 | 1.47  |

|          |                   |                  |            |      |       |
|----------|-------------------|------------------|------------|------|-------|
|          |                   |                  | 12579271   |      |       |
| SERPINE1 | RETEPLASE         | DrugBank         | 17963464   | 2.9  | 1.4   |
| SERPINE1 | ANISTREPLASE      | DrugBank         | 17963464   | 2.9  | 1.4   |
| SERPINE1 | CETRORELIX        | NCI              | 16391860   | 2.18 | 1.05  |
| SERPINE1 | DEFIBROTIDE       | NCI              | 12745658   | 1.74 | 0.84  |
| SERPINE1 | TROGLITAZONE      | DrugBank         | 10871202   | 1.54 | 0.37  |
|          |                   |                  | 10418858   |      |       |
|          |                   |                  | 10770198   |      |       |
|          |                   |                  | 10831180   |      |       |
|          |                   |                  | 10768100   |      |       |
| THBS2    | BEVACIZUMAB       | NCI              | 16365183   | 0.42 | 2.77  |
| CD44     | BIVATUZUMAB       | DrugBank         | 14530488   | 8.71 | 22.72 |
| CD44     | HYALURONAN        | TdgClinicalTrial | None found | 1.45 | 3.79  |
| CD44     | GENTAMICIN        | NCI              | 14967965   | 0.38 | 0.99  |
| CD44     | HYALURONATE       | DrugBank         | None found | 0.29 | 0.76  |
|          | SODIUM            |                  |            |      |       |
| CD44     | PROGESTERONE      | NCI              | 11605071   | 0.11 | 0.3   |
| CDH1     | VOLASERTIB        | JAX-CKB          | 26597303   | 2.18 | 4.73  |
| CDH1     | BICALUTAMIDE      | CGI              | None found | 0.54 | 1.18  |
| CDH1     | LAPATINIB         | JAX-CKB          | 26487584   | 0.31 | 0.68  |
| CDH1     | SELUMETINIB       | JAX-CKB          | 26251290   | 0.25 | 0.54  |
| CDH1     | CAPECITABINE      | JAX-CKB          | 26487584   | 0.24 | 0.53  |
| CDH1     | ERLOTINIB         | JAX-CKB          | 26251290   | 0.16 | 0.36  |
| TIMP3    | PIMAGEDINE        | DrugBank         | None found | 1.09 | 14.2  |
| LGALS1   | THIODIGALACTOSIDE | DrugBank         | 10592235   | 8.71 | 28.4  |
|          |                   |                  | 17139284   |      |       |
|          |                   |                  | 17016423   |      |       |
| LGALS1   | DITHIOTHREITOL    | DrugBank         | 10592235   | 1.74 | 5.68  |
|          |                   |                  | 17139284   |      |       |
|          |                   |                  | 17016423   |      |       |
| LGALS1   | 2-MERCAPTOETHANO  | DrugBank         | 10592235   | 1.74 | 5.68  |
|          | L                 |                  |            |      |       |
| LGALS1   | ARTENIMOL         | DrugBank         | 26340163   | 0.11 | 0.35  |
| FGF2     | SUCRALFATE        | DrugBank         | 7948825    | 6.1  | 3.61  |

|       |               |                          |            |      |      |
|-------|---------------|--------------------------|------------|------|------|
|       |               | TTD                      | 8578218    |      |      |
|       |               |                          | 1957124    |      |      |
|       |               |                          | 1970337    |      |      |
|       |               |                          | 8578198    |      |      |
| FGF2  | ABT-510       | DrugBank                 | 16051960   | 3.73 | 1.11 |
|       |               | NCI                      |            |      |      |
| FGF2  | REBAMIPIDE    | NCI                      | 8774986    | 2.9  | 1.72 |
| FGF2  | FAMOTIDINE    | NCI                      | 11943947   | 2.18 | 1.29 |
| FGF2  | THYROTROPIN   | NCI                      | 7519916    | 1.74 | 1.03 |
| FGF2  | PYRAZOLE      | NCI                      | 9730230    | 1.24 | 0.74 |
| FGF2  | TRIAMCINOLONE | NCI                      | 15923512   | 1.14 | 0.22 |
| FGF2  | LENALIDOMIDE  | PharmGKB                 | 28373444   | 1.09 | 0.32 |
| FGF2  | SQUALAMINE    | TTD                      | None found | 1.09 | 0.65 |
| FGF2  | QUIZARTINIB   | CIViC                    | 27671675   | 0.97 | 0.57 |
| VEGFC | VGX-100       | TTD                      | None found | 4.36 | 9.47 |
| VEGFC | AFLIBERCEPT   | PharmGKB                 | 20124951   | 1.74 | 3.79 |
| VEGFC | CONBERCEPT    | ChEMBLInteractions       | None found | 1.09 | 2.37 |
| VEGFC | BEVACIZUMAB   | ClarityFoundationClinica | 20124951   | 0.64 | 0.69 |
|       |               | ITrial                   |            |      |      |
|       |               | PharmGKB                 |            |      |      |
| VEGFC | LENALIDOMIDE  | ClarityFoundationClinica | None found | 0.54 | 0.59 |
|       |               | ITrial                   |            |      |      |
| VEGFC | SUNITINIB     | CIViC                    | 21787417   | 0.2  | 0.44 |
| APOE  | LUTEIN        | NCI                      | 11413081   | 4.36 | 2.84 |
| APOE  | GANCICLOVIR   | NCI                      | 16322528   | 2.18 | 1.42 |
| APOE  | SOYBEAN OIL   | NCI                      | 3021887    | 1.74 | 1.14 |
| APOE  | ACENOCOUMAROL | PharmGKB                 | 29432897   | 1.45 | 0.95 |
| APOE  | TRIAMCINOLONE | NCI                      | 9150415    | 1.14 | 0.25 |
| APOE  | IRBESARTAN    | NCI                      | 12827021   | 0.73 | 0.47 |
| APOE  | ATORVASTATIN  | PharmGKB                 | 16103896   | 0.68 | 0.22 |
|       |               |                          | 19667110   |      |      |
|       |               |                          | 20031582   |      |      |
|       |               |                          | 17289397   |      |      |
| APOE  | RITONAVIR     | PharmGKB                 | 17700364   | 0.65 | 0.43 |



|        |               |                     |                      |      |      |
|--------|---------------|---------------------|----------------------|------|------|
| APOE   | FLUVASTATIN   | PharmGKB            | 15809899<br>17289397 | 0.59 | 0.39 |
|        |               |                     | 30363031             |      |      |
| APOE   | TROGLITAZONE  | NCI                 | 15057551             | 0.51 | 0.17 |
| MMP1   | CHEMBL1235735 | DrugBank            | 10592235             | 8.71 | 4.54 |
| MMP1   | CHEMBL92608   | DrugBank            | 10592235             | 8.71 | 4.54 |
| MMP1   | CHEMBL45483   | DrugBank            | 10592235             | 8.71 | 4.54 |
| MMP1   | CIPEMASTAT    | GuideToPharmacology | None found           | 4.36 | 2.27 |
|        |               | TTD                 |                      |      |      |
| MMP1   | LEUPROLIDE    | NCI                 | 9433928              | 4.36 | 2.27 |
|        | ACETATE       |                     |                      |      |      |
| MMP1   | CHEMBL267178  | DrugBank            | 10592235             | 4.36 | 2.27 |
| MMP1   | CHEMBL11306   | DrugBank            | 10592235             | 4.36 | 2.27 |
| MMP1   | PENTOSAN      | NCI                 | 1384503              | 4.36 | 2.27 |
|        | POLYSULFATE   |                     |                      |      |      |
|        | SODIUM        |                     |                      |      |      |
| MMP1   | APRATASTAT    | GuideToPharmacology | None found           | 2.9  | 1.51 |
|        |               | TTD                 |                      |      |      |
| MMP1   | TRIAMCINOLONE | NCI                 | 12123742             | 1.14 | 0.2  |
| FN1    | L19IL2        | ChEMBLInteractions  | None found           | 4.36 | 8.12 |
| FN1    | L19TNFA       | ChEMBLInteractions  | None found           | 4.36 | 8.12 |
| FN1    | L19SIP 131I   | ChEMBLInteractions  | None found           | 4.36 | 8.12 |
| FN1    | OCRIPLASMIN   | DrugBank            | 23193358             | 2.23 | 0.83 |
|        |               | ChEMBLInteractions  |                      |      |      |
|        |               | TTD                 |                      |      |      |
| FN1    | ZINC CHLORIDE | DrugBank            | 23896426             | 0.27 | 0.25 |
|        |               |                     | 20541508             |      |      |
| FN1    | LANOTEPLASE   | DrugBank            | None found           | 0.26 | 0.48 |
| FN1    | METHYLDOPA    | DrugBank            | 23896426             | 0.11 | 0.1  |
| POSTN  | -             |                     |                      |      |      |
| FBN1   | -             |                     |                      |      |      |
| PRSS23 | -             |                     |                      |      |      |
| FSTL1  | -             |                     |                      |      |      |
| TIMP1  | -             |                     |                      |      |      |

VWA1 -  
IGFBP7 -  
IGFBP4 -

---

**Supplementary Table 7. Screening DETGs in choriocarcinoma by integrated microarray.**

| <b>DETGs</b>  | <b>Gene names</b>                                                                                                                                                                                                                 |
|---------------|-----------------------------------------------------------------------------------------------------------------------------------------------------------------------------------------------------------------------------------|
| Upregulated   | BTG2 EPB41L4B FNBP1L KLF4 CAPN6 MAP7 IMPA2 MBD2 DTX4 KDM5B PGF SESN1 FZD5 RASL11B MYCN<br>ATP2B4 PEG3 SLC1A3 TGFBR3 PRKCH LIN28A FLVCR2 SOX13 SOX4 RGS16 SLC2A3 COL21A1 PLXNA2<br>ERBB3 HAND1 TFAP2C DCP2 CEBPA PRSS8             |
| Downregulated | ITGA3 PRR16 ALCAM PXDN OXTR ZFPM2 COL5A2 WNT5A IGFBP5 MYBL1 DAZAP2 LOX SLC7A1 LBH CYR61<br>RALBP1 MLXIP NETO2 GJA1 TIMP3 ARID5B EMP1 PFN2 DUSP1 FBN1 COL3A1 MARCKS ATAD2 SERPINE1<br>MAP1B SPARC TMSB4X TGFBI PRKCA SEMA3C SPOCK1 |

Abbreviations: DETGs, differentially expressed target genes

**Supplementary Table 8. GO terms and KEGG pathway analysis of 70 DETGs in choriocarcinoma.**

| <b>Term</b>                    | <b>Description</b>                          | <b>Count</b> | <b>LogP</b> |
|--------------------------------|---------------------------------------------|--------------|-------------|
| <b>GO Biological Processes</b> |                                             |              |             |
| GO:0007507                     | heart development                           | 16           | -12.39      |
| GO:0001568                     | blood vessel development                    | 16           | -10.4       |
| GO:0030155                     | regulation of cell adhesion                 | 15           | -9.54       |
| GO:0009611                     | response to wounding                        | 14           | -9.137      |
| GO:0001667                     | ameboidal-type cell migration               | 12           | -8.683      |
| GO:0001704                     | formation of primary germ layer             | 7            | -7.816      |
| GO:0071363                     | cellular response to growth factor stimulus | 13           | -7.746      |
| GO:0001501                     | skeletal system development                 | 11           | -7.505      |
| GO:0009791                     | post-embryonic development                  | 6            | -7.442      |
| GO:0030198                     | extracellular matrix organization           | 10           | -7.307      |
| GO:0006935                     | chemotaxis                                  | 12           | -7.232      |
| GO:0030324                     | lung development                            | 7            | -6.773      |
| GO:0060174                     | limb bud formation                          | 3            | -5.621      |
| GO:0010232                     | vascular transport                          | 5            | -5.562      |
| GO:1901652                     | response to peptide                         | 9            | -5.214      |
| GO:0007162                     | negative regulation of cell adhesion        | 7            | -5.056      |
| GO:0032355                     | response to estradiol                       | 5            | -4.816      |
| GO:0070371                     | ERK1 and ERK2 cascade                       | 7            | -4.767      |
| GO:0051098                     | regulation of binding                       | 7            | -4.516      |
| GO:0090066                     | regulation of anatomical structure size     | 8            | -4.511      |
| <b>GO Cellular Components</b>  |                                             |              |             |
| GO:0031012                     | extracellular matrix                        | 13           | -8.897      |
| GO:0009925                     | basal plasma membrane                       | 6            | -4.504      |
| GO:0031093                     | platelet alpha granule lumen                | 3            | -3.202      |
| GO:0005604                     | basement membrane                           | 3            | -2.776      |
| GO:0048471                     | perinuclear region of cytoplasm             | 7            | -2.686      |
| GO:0070160                     | tight junction                              | 3            | -2.434      |
| GO:0098797                     | plasma membrane protein complex             | 6            | -2.081      |
| <b>GO Molecular Functions</b>  |                                             |              |             |
| GO:0005201                     | extracellular matrix structural constituent | 8            | -7.989      |

|            |                                                                             |   |        |
|------------|-----------------------------------------------------------------------------|---|--------|
| GO:0019838 | growth factor binding                                                       | 7 | -7.268 |
| GO:0005178 | integrin binding                                                            | 6 | -5.828 |
| GO:0001228 | DNA-binding transcription activator activity,<br>RNA polymerase II-specific | 8 | -4.849 |
| GO:0061980 | regulatory RNA binding                                                      | 3 | -3.685 |
| GO:0002020 | protease binding                                                            | 4 | -3.49  |
| GO:0008201 | heparin binding                                                             | 4 | -3.123 |
| GO:0030165 | PDZ domain binding                                                          | 3 | -2.916 |
| GO:0019900 | kinase binding                                                              | 7 | -2.619 |
| GO:0008509 | anion transmembrane transporter activity                                    | 5 | -2.231 |
| GO:0001227 | DNA-binding transcription repressor activity,<br>RNA polymerase II-specific | 4 | -2.141 |

#### **KEGG Pathway**

|          |                                                         |   |        |
|----------|---------------------------------------------------------|---|--------|
| hsa05205 | Proteoglycans in cancer                                 | 7 | -5.921 |
| ko05206  | MicroRNAs in cancer                                     | 7 | -5.018 |
| hsa04020 | Calcium signaling pathway                               | 4 | -2.955 |
| ko04974  | Protein digestion and absorption                        | 3 | -2.83  |
| ko04933  | AGE-RAGE signaling pathway in diabetic<br>complications | 3 | -2.711 |

---





|                            |         |         |        |        |        |        |       |  |   |
|----------------------------|---------|---------|--------|--------|--------|--------|-------|--|---|
| hsa-miR-598-3p             | LIN28A  |         |        |        |        |        |       |  | 0 |
| hsa-miR-889-3p             | FLVCR2  |         |        |        |        |        |       |  | 0 |
| <b>Downregulated miRNA</b> |         |         |        |        |        |        |       |  |   |
| hsa-miR-519c-3p            | MAP7    | RASL11B | SOX4   | ZFPM2  | MYBL1  | DAZAP2 | NETO2 |  | 3 |
| hsa-miR-520a-5p            | DTX4    | PGF     | FZD5   |        |        |        |       |  | 3 |
| hsa-miR-519a-3p            | RASL11B | SOX4    | MAP1B  | ZFPM2  | DAZAP2 |        |       |  | 2 |
| hsa-miR-515-5p             | BTG2    | LIN28A  | CYR61  | MLXIP  |        |        |       |  | 2 |
| hsa-miR-520a-3p            | MYCN    | MAP1B   | ZFPM2  | DAZAP2 |        |        |       |  | 1 |
| hsa-miR-373-3p             | MYCN    | ATAD2   | MAP1B  | DAZAP2 |        |        |       |  | 1 |
| hsa-miR-372-3p             | MYCN    | ZFPM2   | DAZAP2 |        |        |        |       |  | 1 |
| hsa-miR-520f-3p            | MBD2    | ATAD2   | WNT5A  |        |        |        |       |  | 1 |
| hsa-miR-512-5p             | FNBP1L  | SPOCK1  |        |        |        |        |       |  | 1 |
| hsa-miR-525-5p             | PGF     |         |        |        |        |        |       |  | 1 |
| hsa-miR-512-3p             | WNT5A   | DAZAP2  | PFN2   |        |        |        |       |  | 0 |
| hsa-miR-520e               | DAZAP2  | MAP1B   |        |        |        |        |       |  | 0 |
| hsa-miR-520b               | DAZAP2  |         |        |        |        |        |       |  | 0 |
| hsa-miR-519e-3p            | DAZAP2  |         |        |        |        |        |       |  | 0 |
| hsa-miR-375                | WNT5A   |         |        |        |        |        |       |  | 0 |

---

The downregulated miRNA and genes are labeled in red.
